# Supplementary material for: Design of protein-binding proteins from the target structure alone
Source: PubMed Central journal article supplement (PMC9117152; doi:10.1038/s41586-022-04654-9), 2022-03-24
Supplement: 41586_2022_4654_MOESM2_ESM.pdf [file 41586_2022_4654_MOESM2_ESM.pdf]

## Reporting Summary

Nature Portfolio wishes to improve the reproducibility of the work that we publish. This form provides structure for consistency and transparency in reporting. For further information on Nature Portfolio policies, see our [Editorial Policies](#) and the [Editorial Policy Checklist](#).

### Statistics

For all statistical analyses, confirm that the following items are present in the figure legend, table legend, main text, or Methods section.

- |                                     |                                                                                                                                                                                                                                                                                                |
|-------------------------------------|------------------------------------------------------------------------------------------------------------------------------------------------------------------------------------------------------------------------------------------------------------------------------------------------|
| n/a                                 | Confirmed                                                                                                                                                                                                                                                                                      |
| <input type="checkbox"/>            | <input checked="" type="checkbox"/> The exact sample size ( $n$ ) for each experimental group/condition, given as a discrete number and unit of measurement                                                                                                                                    |
| <input type="checkbox"/>            | <input checked="" type="checkbox"/> A statement on whether measurements were taken from distinct samples or whether the same sample was measured repeatedly                                                                                                                                    |
| <input checked="" type="checkbox"/> | <input type="checkbox"/> The statistical test(s) used AND whether they are one- or two-sided<br><i>Only common tests should be described solely by name; describe more complex techniques in the Methods section.</i>                                                                          |
| <input type="checkbox"/>            | <input checked="" type="checkbox"/> A description of all covariates tested                                                                                                                                                                                                                     |
| <input type="checkbox"/>            | <input checked="" type="checkbox"/> A description of any assumptions or corrections, such as tests of normality and adjustment for multiple comparisons                                                                                                                                        |
| <input type="checkbox"/>            | <input checked="" type="checkbox"/> A full description of the statistical parameters including central tendency (e.g. means) or other basic estimates (e.g. regression coefficient) AND variation (e.g. standard deviation) or associated estimates of uncertainty (e.g. confidence intervals) |
| <input type="checkbox"/>            | <input checked="" type="checkbox"/> For null hypothesis testing, the test statistic (e.g. $F$ , $t$ , $r$ ) with confidence intervals, effect sizes, degrees of freedom and $P$ value noted<br><i>Give <math>P</math> values as exact values whenever suitable.</i>                            |
| <input checked="" type="checkbox"/> | <input type="checkbox"/> For Bayesian analysis, information on the choice of priors and Markov chain Monte Carlo settings                                                                                                                                                                      |
| <input checked="" type="checkbox"/> | <input type="checkbox"/> For hierarchical and complex designs, identification of the appropriate level for tests and full reporting of outcomes                                                                                                                                                |
| <input checked="" type="checkbox"/> | <input type="checkbox"/> Estimates of effect sizes (e.g. Cohen's $d$ , Pearson's $r$ ), indicating how they were calculated                                                                                                                                                                    |

*Our web collection on [statistics for biologists](#) contains articles on many of the points above.*

### Software and code

Policy information about [availability of computer code](#)

Data collection

Data analysis

For manuscripts utilizing custom algorithms or software that are central to the research but not yet described in published literature, software must be made available to editors and reviewers. We strongly encourage code deposition in a community repository (e.g. GitHub). See the Nature Portfolio [guidelines for submitting code & software](#) for further information.

### Data

Policy information about [availability of data](#)

All manuscripts must include a [data availability statement](#). This statement should provide the following information, where applicable:

- Accession codes, unique identifiers, or web links for publicly available datasets
- A description of any restrictions on data availability
- For clinical datasets or third party data, please ensure that the statement adheres to our [policy](#)

The atomic coordinates and experimental data of H3\_mb in complex with H3 HA, TrkA\_mb in complex with TrkA, unbound FGFR2\_mb, FGFR2\_mb in complex with FGFR4, unbound IL-7R $\alpha$ \_mb, IL-7R $\alpha$ \_mb in complex with IL-7R $\alpha$  and VirB8\_mb in complex with VirB8 have been deposited in the RCSB Protein Database with the accession numbers of 7RDH, 7N3T, 7N1K, 7N1J, 7S5B, 7OPB and 7SH3 respectively. Diffraction images for the TrkA minibinder complex have been deposited in the SGrid Data Bank with ID 838.

## Field-specific reporting

Please select the one below that is the best fit for your research. If you are not sure, read the appropriate sections before making your selection.

Life sciences       Behavioural & social sciences       Ecological, evolutionary & environmental sciences

For a reference copy of the document with all sections, see [nature.com/documents/nr-reporting-summary-flat.pdf](https://www.nature.com/documents/nr-reporting-summary-flat.pdf)

## Life sciences study design

All studies must disclose on these points even when the disclosure is negative.

|                 |                                                                                                                                                                                                                                                                                                                 |
|-----------------|-----------------------------------------------------------------------------------------------------------------------------------------------------------------------------------------------------------------------------------------------------------------------------------------------------------------|
| Sample size     | 15,000 to 100,000 designs were ordered for each targeting site and this depends on the Angilent Oligo library size. No statistical method was used to determine the total number of designs to be experimentally tested. The numbers are chosen because the size of an Angilent Oligo Pool is 15,000 or 60,000. |
| Data exclusions | There is no data exclusion in this study.                                                                                                                                                                                                                                                                       |
| Replication     | Experimental finders were statistically significant and no attempt at reproduction was performed.                                                                                                                                                                                                               |
| Randomization   | For the cell signaling assay, the cells were randomly separated into group and then treated with different concentrations of miniprotein binders.                                                                                                                                                               |
| Blinding        | For the cell signaling assay, researchers were not blinded to different cell groups.                                                                                                                                                                                                                            |

## Reporting for specific materials, systems and methods

We require information from authors about some types of materials, experimental systems and methods used in many studies. Here, indicate whether each material, system or method listed is relevant to your study. If you are not sure if a list item applies to your research, read the appropriate section before selecting a response.

### Materials & experimental systems

### Methods

| n/a                                 | Involved in the study                                     | n/a                                 | Involved in the study                              |
|-------------------------------------|-----------------------------------------------------------|-------------------------------------|----------------------------------------------------|
| <input type="checkbox"/>            | <input checked="" type="checkbox"/> Antibodies            | <input checked="" type="checkbox"/> | <input type="checkbox"/> ChIP-seq                  |
| <input type="checkbox"/>            | <input checked="" type="checkbox"/> Eukaryotic cell lines | <input type="checkbox"/>            | <input checked="" type="checkbox"/> Flow cytometry |
| <input checked="" type="checkbox"/> | <input type="checkbox"/> Palaeontology and archaeology    | <input checked="" type="checkbox"/> | <input type="checkbox"/> MRI-based neuroimaging    |
| <input checked="" type="checkbox"/> | <input type="checkbox"/> Animals and other organisms      |                                     |                                                    |
| <input checked="" type="checkbox"/> | <input type="checkbox"/> Human research participants      |                                     |                                                    |
| <input checked="" type="checkbox"/> | <input type="checkbox"/> Clinical data                    |                                     |                                                    |
| <input checked="" type="checkbox"/> | <input type="checkbox"/> Dual use research of concern     |                                     |                                                    |

## Antibodies

|                 |                                                                                                                                                                                                                                                                                                                                                                                              |
|-----------------|----------------------------------------------------------------------------------------------------------------------------------------------------------------------------------------------------------------------------------------------------------------------------------------------------------------------------------------------------------------------------------------------|
| Antibodies used | Fl6v3 antibody was kindly provided by Deborah H. Fuller at University of Washington; Alexa Fluor 488 conjugated anti-ERK1/2 pT202/pY204 antibody for BD Bioscience; Alexa Fluor 647 conjugated anti-Akt pS473 antibody from Cell Signaling Technology; Anti-rabbit HRP conjugated secondary antibody from Bio-Rad Laboratories; HRP-conjugated secondary antibody from Bio-Rad Laboratories. |
| Validation      | Corti, D. et al. A neutralizing antibody selected from plasma cells that binds to group 1 and group 2 influenza A hemagglutinins. Science333, 850-856, doi:10.1126/science.1205669(2011). For the commercially available antibodies, the researchers didn't do any additional validation.                                                                                                    |

## Eukaryotic cell lines

Policy information about [cell lines](#)

|                          |                                                                                                                                                                                                                |
|--------------------------|----------------------------------------------------------------------------------------------------------------------------------------------------------------------------------------------------------------|
| Cell line source(s)      | TF-1(ATCC CRL-2003); HEK293T (ATCC), Mark Hall, Department of Biochemistry, University of Birmingham, UK; Human Umbilical Vein Endothelial Cells, LONZA, Cat #2519A. Hi5 cells (ATCC)                          |
| Authentication           | Authenticated by vendors and we didn't do any additional authentication.                                                                                                                                       |
| Mycoplasma contamination | TF-1, confirmed negative for mycoplasma; HET293T, negative, confirmed by PlasmO Test; Human Umbilical Vein Endothelial Cells, confirmed negative for mycoplasma. Hi5 cells, confirmed negative for mycoplasma. |

Commonly misidentified lines  
(See [ICLAC](#) register)

No commonly misidentified cell lines were used in this study.

## Flow Cytometry

### Plots

Confirm that:

- The axis labels state the marker and fluorochrome used (e.g. CD4-FITC).
- The axis scales are clearly visible. Include numbers along axes only for bottom left plot of group (a 'group' is an analysis of identical markers).
- All plots are contour plots with outliers or pseudocolor plots.
- A numerical value for number of cells or percentage (with statistics) is provided.

### Methodology

Sample preparation

Yeast Cell are incubated with the target protein and then labeled with anti-Myc Antibody conjugated with FITC and Streptavidin conjugated with PE. The cells were washed with PBSF. See Methods for experimental details.

Instrument

Sony SH800

Software

FlowJo10

Cell population abundance

Yes

Gating strategy

Cells labeled without the target protein were used as negative control and all the cells showed binding signal were collected.

- Tick this box to confirm that a figure exemplifying the gating strategy is provided in the Supplementary Information.
